# Supplementary material for: Reversion of tumor hepatocytes to normal hepatocytes during liver tumor regression in an oncogene-expressing transgenic zebrafish model
Source: PubMed Central journal article supplement (PMC6826027; doi:10.1242/dmm.039578), 2019-10-01
Supplement: dmm-12-039578-s1.pdf [file dmm-12-039578-s1.pdf]

**Table S1. List of PCR primers for comparing RFP and GFP cells in Fig. S2**

| <b>Gene Symbol</b> | <b>Accession ID</b> | <b>Forward Primer</b>  | <b>Reverse Primer</b>  |
|--------------------|---------------------|------------------------|------------------------|
| <i>cre</i>         | YP_006472           | GCCAGCTAAACATGCTTCAT   | TAACATTCTCCCACCGTCAG   |
| <i>xmrk</i>        | X16891              | GACTGCTGCAACGAACACTG   | CATTCCTTGACACAAGCGGC   |
| <i>ccnd1</i>       | NM_131025           | TTCCTTGCCAAACTGCCTAT   | GGTGAGGTTCTGGGATGAGA   |
| <i>ccng1</i>       | NM_199481.1         | GCTCAACTGGAAGGTCAAGG   | CAGGGCCAGAAGAGACAAAG   |
| <i>cdk1</i>        | NM_212564.2         | CTCTGGGGACCCCTAACAAT   | CGGATGTGTCATTGCTTGTC   |
| <i>cdk2</i>        | NM_213406.1         | CAGCTCTTCCGGATATTTTCG  | CCGAGATCCTCTTGTTTGA    |
| <i>pcna</i>        | NM_131404.2         | GGCAACATCAAGCTCTCACA   | TGCAATTTTGTCTCAACCA    |
| <i>mcm2</i>        | NM_173257.2         | GCTACGACCCGTCTCTAACG   | CGTCGAATGTGTTGGGAAGC   |
| <i>pold4</i>       | NM_001256200.1      | GAACCCCCACAACACTGAGTGA | TGTA CTCTGGGTCAGTGCCT  |
| <i>tp53</i>        | NM_001271820.1      | GCTTGGTGCTGAATGGACAAC  | CGTTTGGTCCCAGTGGTGG    |
| <i>cyp1a</i>       | NM_131879.2         | TGCGAAGACCGAAAACCTGGA  | GTGCGATCCTTCCCAGTCTT   |
| <i>adh5</i>        | NM_131849.2         | AGCTCTTCCACTTCATGGGC   | ACTTGCAGCCCATTACGACA   |
| <i>adh8a</i>       | NM_001001946.4      | AAGCGAGGTTTTCTGTCTGT   | GAAGGTGCTGGTTCCCATGA   |
| <i>apoa1b</i>      | NM_001100144.2      | AGTCTCTTCCCAGACCAGCC   | GGTGAGTGAGGGACTTGTGT   |
| <i>apoa2</i>       | NM_001130586.1      | GAGGCTTGTCATGCTTGGG    | ATTCAGGCGAGCTTTGTCCA   |
| <i>fabp3</i>       | NM_152961.3         | GGACGGTAAAGAGACGACCC   | GAAACGGTGCAAAGGAGAGC   |
| <i>pklr</i>        | NM_201289.1         | GGACAACCGTGTACCTTCG    | CAGGAGGCTGTCAATCAAAGAC |
| <i>pdhb</i>        | NM_213154.1         | TGCTTGGTACGGTCACTGTC   | CCATTCGGGAGTGAGACACC   |
| <i>aldob</i>       | NM_194367.3         | GCCACTGAGAAGGTCTTAGC   | CACTCTGACCCCCAGAGAGA   |
| <i>gapdh</i>       | NM_001115114.1      | GGGCTGCCAAGGCTGTAGGC   | GGACACAACCTGGTGCTCCGTG |

**Table S2.**

[Click here to Download Table S2](#)

**Table S3. List of PCR primers for validation of RNA-seq data in Fig. S4**

| Type              | Gene symbol   | Forward Primer        | Reverse Primer            |
|-------------------|---------------|-----------------------|---------------------------|
| unique up_T       | <i>ccng1</i>  | GGTGTGCAGGGCAGAAGTAA  | GTCCACAGAGTTTGGGCTGA      |
| unique up_T       | <i>dynll1</i> | AGTCGCTGTTTTCTCCGTGT  | GCCAGGTGGGGTTGTACTTT      |
| unique up_T       | <i>cox6a1</i> | CGAGTTCGTACCCTACAGCC  | ACAAACTGGACAGGCGTCAT      |
| unique up_T       | <i>b2m</i>    | TTGTCTGCTTGGCTCTCTCG  | CCTGTCCGTTCTTCAGCAGT      |
| unique up_T       | <i>rbp5</i>   | ATCTGGCGGCTTTGGATGTT  | CGTAGTTTGGCACTTTCGCC      |
| unique up_RFP+R   | <i>adh8a</i>  | AAGCGAGGTTTTCTGTCTGT  | GAAGGTGCTGGTTCATGA        |
| unique up_RFP+R   | <i>fbp1b</i>  | AGCCATTTCCACTGCTGTCA  | AGAGCCATCCAGAGGGTCAA      |
| unique up_RFP+R   | <i>C7</i>     | ATGTCCAAGCGGAATGCAGA  | CTGGCAGACACTCATTCCGGT     |
| unique up_RFP+R   | <i>agt</i>    | GAGGGAGCCAGTCTACAGGA  | GCCCTCCGTCATCTCAAACA      |
| unique up_RFP+R   | <i>cefp</i>   | CTGTTCTGGTTGTCGCTCT   | TGAATCTCTAAATTGTGGAATCCGT |
| unique up_GFP+R   | <i>eef1g</i>  | GCAGTGGGTGAGTTTTGCTG  | GACGCAGGTCACAAACCAAC      |
| unique up_GFP+R   | <i>rpl39</i>  | GTCGCACAAGACCTTCAGGA  | CTGGCAGGGAACAGATGGAG      |
| unique up_GFP+R   | <i>tm4sf4</i> | GTCCTCTGCAACATCCTGCT  | CGCCGCAAACAGAATAGAGC      |
| unique up_GFP+R   | <i>vdac1</i>  | AGGAACCGCATCACACAGAG  | CTGGTATTTGGCTGCGATGC      |
| unique up_GFP+R   | <i>nlk1</i>   | CTGCAAACGTGTGTTTCAGGG | GTGGAGAATGCCTGCTGAGT      |
| unique down_T     | <i>rpl19</i>  | CTTCCGCTGACCACCAGC    | TGACGACCCTTCTTCGTG        |
| unique down_T     | <i>hgd</i>    | CTGATCACACCTTTCGGCCT  | GACGCTGACAGGTCTCCAAA      |
| unique down_T     | <i>adh5</i>   | AGCTCTTCCACTTCATGGGC  | ACTTGCAGCCCATTACGACA      |
| unique down_T     | <i>cyp1a</i>  | TGCGAAGACCGAAAACCTGGA | GTGCGATCCTTCCCGATCTT      |
| unique down_RFP+R | <i>dap</i>    | AAGACAACGACGCGACTCTT  | GACCACAACAGGCAGCTTTG      |
| unique down_RFP+R | <i>sord</i>   | CTGGTCGAGTGGTGAAGGTC  | CTGACAGGGGCTCAATCAGG      |
| unique down_RFP+R | <i>aco2</i>   | CCTGGGAGTTGAAGTGTC    | TGGCAATTTCTCCTCGACCC      |
| unique down_RFP+R | <i>nipal4</i> | AAAAAGAAGGCACTGCTGCG  | GCAGCCCAATTTTCCAAGCA      |
| unique down_RFP+R | <i>psmd1</i>  | AAAACGGCAGACGCTAAGGA  | CCCAGTTTGTGCTCTTGCC       |
| unique down_GFP+R | <i>sgk1</i>   | GCTGGGCTTCACTGATGACT  | CCATAGCAGGGGCGTAAGAG      |
| unique down_GFP+R | <i>cyb5b</i>  | CACGGAGTGAAAATGGGGGA  | TTGCTCCAGCAAACCTCCT       |
| unique down_GFP+R | <i>psmb4</i>  | CGAAAGCCATCCACTCCTGG  | CTCATCAGAGGCTGTGCCAA      |
| unique down_GFP+R | <i>cebpa</i>  | AGTACAGGCTGAGGAGGGAG  | CAGTTGCCCATGGCTTTGAC      |
| unique down_GFP+R | <i>psma5</i>  | TGTGCCATGAGTGGCTTGAT  | CGCGTCACACTGGACAAAAG      |
| Reference 1       | <i>mat1a</i>  | GTCTACCATCTGCAGCCCAG  | GGCGTAAGACACCTGAACCA      |
| Reference 2       | <i>cox7b</i>  | TATTAGCACGCGCAGTCAGT  | GACAGGTTCCATGCAATGCC      |

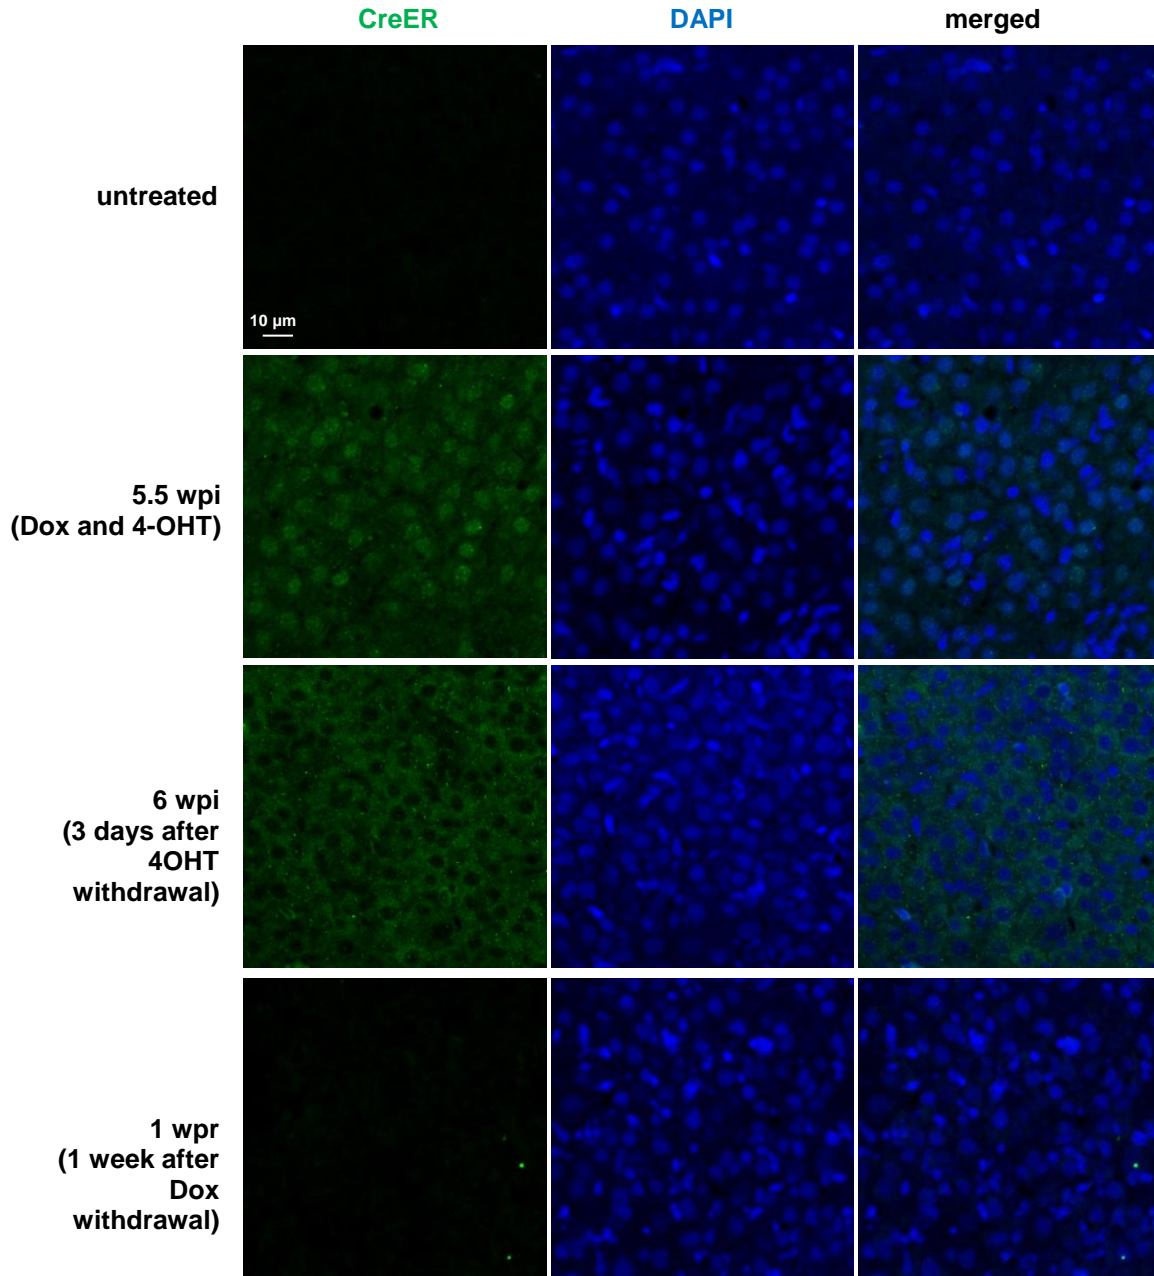

**Fig. S1.** Immunofluorescent staining of liver sections to validate the expression, cellular localization and stability of CreER. In untreated *CreER/xmrk* fish, no expression of CreER was detected. After Dox and 4-OHT induction at 5.5 wpi, CreER was expressed and was localized into nucleus. After 4-OHT withdrawal at 6 wpi, CreER was localized in the cytoplasm while not in the nucleus anymore. After Dox withdrawal at 1 wpr, CreER was basically undetectable.

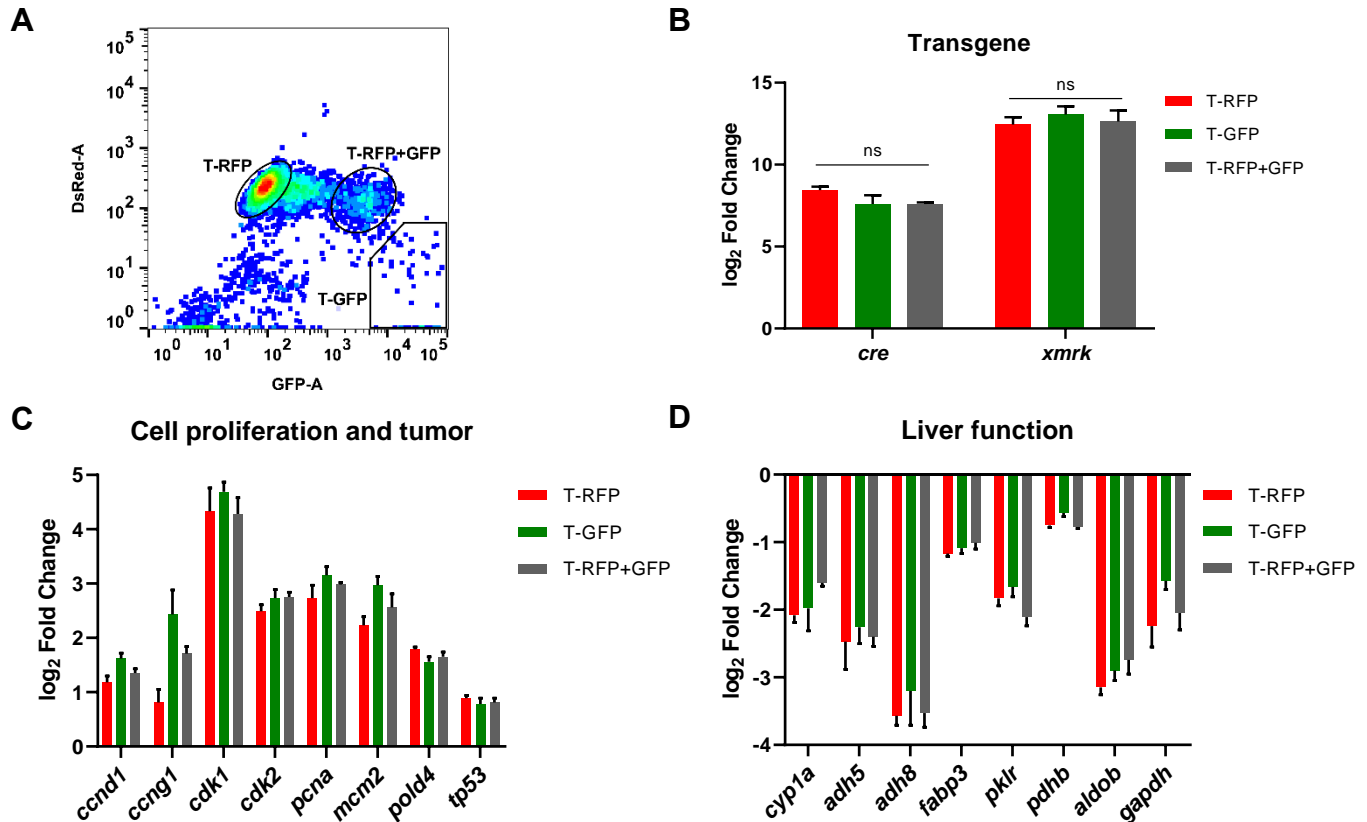

**Fig. S2.** Comparison of RFP+ (T-RFP), GFP+ (T-GFP), and double-positive (T-RFP+GFP) hepatocytes after Dox and 4-OHT treatments at 6 wpi from *CreER/xmrk* fish. (A) T-GFP cells (which failed to undergo loxP recombination and color switch) and T-RFP+GFP cells (which have undergone loxP recombination but with GFP protein not fully degraded) express comparable levels of *cre* and *xmrk* compared to T-RFP+ cells. (B) Genes involved in cell proliferation and tumor were up-regulated in all three population of cells at comparable levels. (C) Genes that are associated with liver function (detoxification metabolism, lipid and glucose metabolism) were down-regulated in all three population of cells at comparable levels. The fold changes are relative to the levels in the normal control hepatocytes. These results indicate that the T-GFP+ and T-RFP+GFP cells at 6 wpi are molecularly equivalent to T-RFP+ tumor cells. The GFP+ cells are likely the tumor hepatocytes that didn't undergo loxP recombination and color switch, rather than newly differentiated hepatocytes.

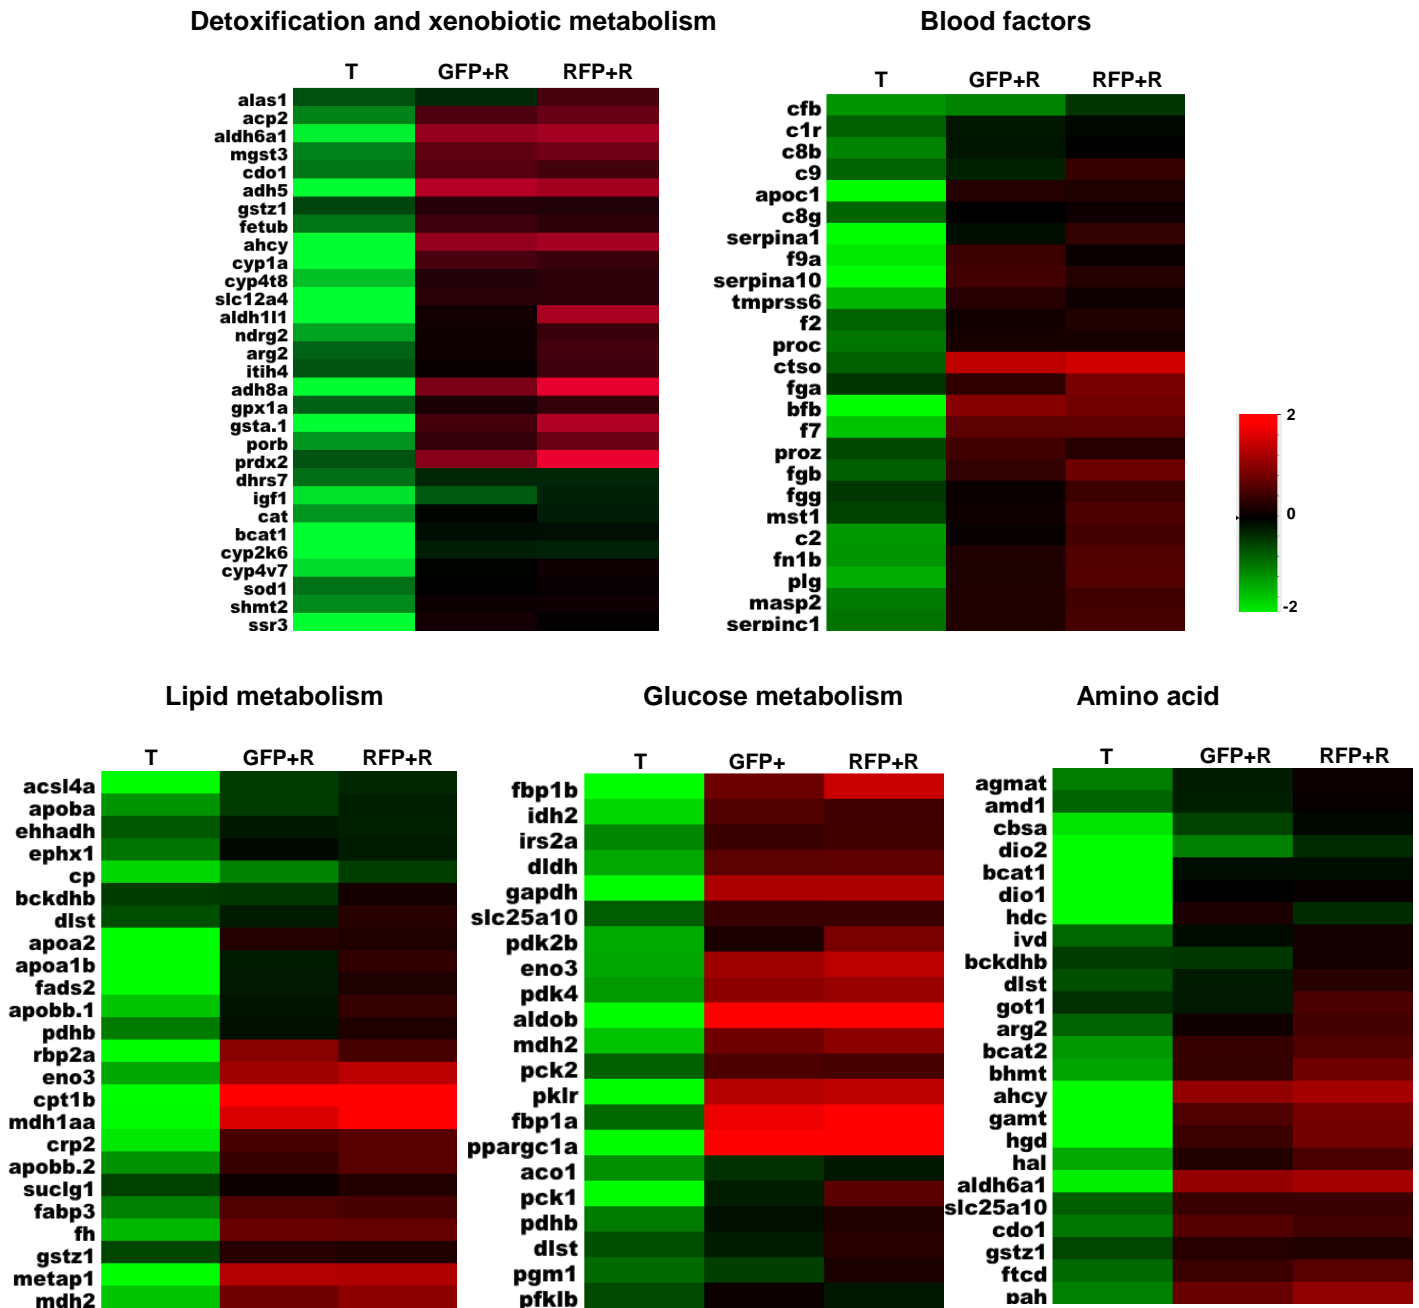

**Fig. S3.** Expression profiles of selected genes that are associated with liver function: Detoxification and xenobiotic metabolism, Blood factors, Lipid metabolism, Glucose metabolism, and Amino acid metabolism. The expression data was based on RNA-Seq analyses and fold changes are relative to the levels in the normal control samples, i.e. T vs C; GFP+R and RFP+R vs CR. The scale represents log<sub>2</sub> Fold Change of 2 to -2.

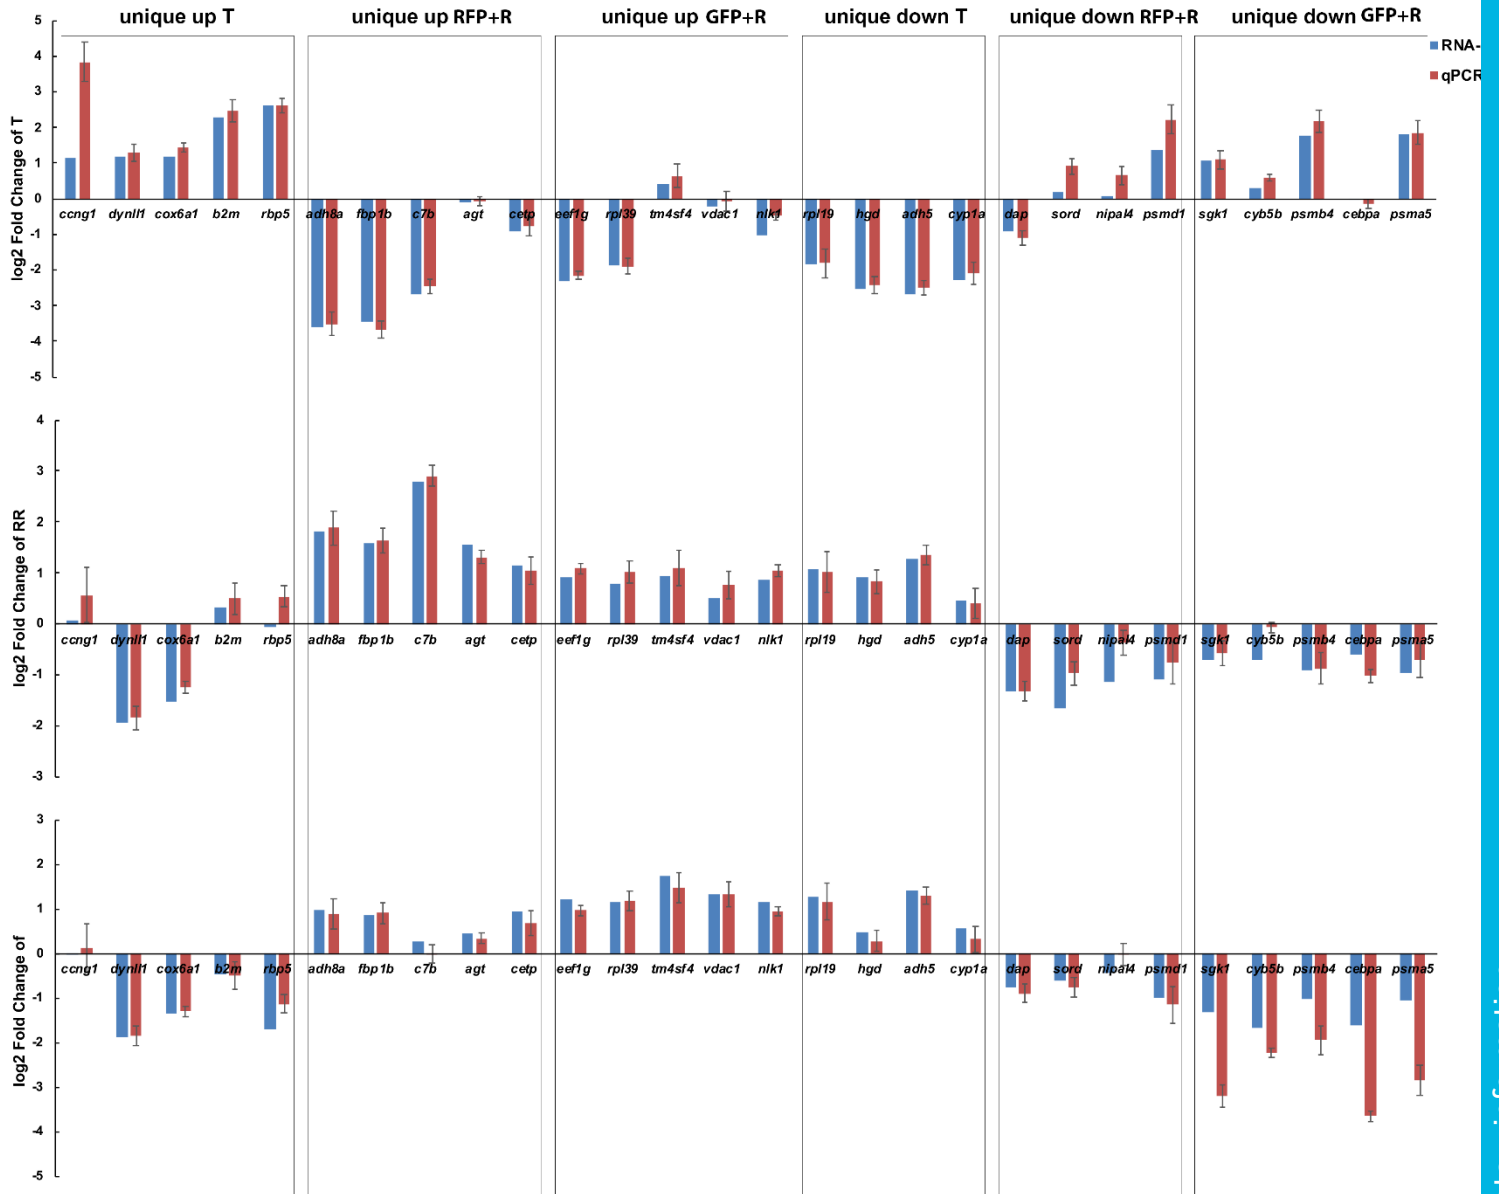

**Fig. S4.** qPCR validation of RNA-seq data. 4-5 genes were selected from each uniquely upregulated or downregulated category in T, RFP+R and GFP+R, as shown in the Venn diagram of Fig. 5 A-B. Genes with different abundance levels (FPKM 10 to 1000) were covered and majority of the genes tested showed good concordance between RT-qPCR and RNA-seq.
